# Supplementary material for: Aptamer-Based Biosensors for Bacterial Detection
Source: Preprints.org preprint supplement (doi:10.20944/preprints202402.0276.v1), 2024-02-05
Supplement: Supplementary file 1 [file supplementary]

Supplementary Data

Review

Aptamer-based biosensors for bacterial detection

Vincent Léguillier1, Brahim Heddi2,*, and Jasmina Vidic1,*

1. Université Paris-Saclay, INRAE, AgroParisTech, Micalis Institut, UMR 1319, 78350 Jouy-en-Josas, France
2. ENS Paris-Saclay, Laboratoire de Biologie et Pharmacologie Appliquée (LBPA), UMR8113 CNRS, 91190 Gif-sur-Yvette, France.

* Correspondence: [brahim.heddi@ens-cachan.fr](mailto:brahim.heddi@ens-cachan.fr) , [jasmina.vidic@inrae.fr](mailto:jasmina.vidic@inrae.fr)

**Summary**

**Table 1.** Sequence of aptamers used for bacterial detection

**Table 1. Sequences of** aptamer used in biosensors for bacterial detection.

| **Bacteria** | **Aptamer** | **Sequence** | **Ref** |
| --- | --- | --- | --- |
| *S. aureus* | SA20  SA23  SA34  SA31  SA43 | GCGCCCTCTCACGTGGCATCAGAGTGCCGGAAGTTCTGCGTTAT  GGGCTGGCCAGATCAGACCCCGGATGATCATCCTTGTGAGAACCA  CACAGTCACTCAGACGGCCGCTATTGTTGCCAGATTGCCTTTGGC  TCCCACGATCTCATTAGTCTGTGGATAAGCGTGGGACGTCTATGA  TCGGCACGTTCTCAGTAGCGCTCGCTGGTCATCCCACAGCTACGTC | [59] |
| *S. aureus* | T1  T2  T3  A14 | ACTGTCrGrCrGrCrArCrGrCrGrUrGrUrGrUrArGrUrArCrArCrArCrGrArUrCrGrCrGrCrGrCrArCrArArUrArU  ACTGTCrArArUrUrUrGrArArUrArUrArUrUrArGrUrGrCrGrCrGrCrCrGrUrArGrUrGrUrGrUrArArArArArUrU  ACTGTCrArArUrUrUrGrArGrUrGrUrGrUrGrArUrCrArUrArUrArUrCrGrUrArGrCrGrCrGrCrUrArCrArArCrC  ACTGTCCACACCGCAGCAGTGGGAACGTTTCAGCCATGCAAGCATCACGCCCGT | [44] |
| *S. aureus* | H1 | GCAATGGTACGGTACTTCCTCGGCACGTTCTCAGTAGCGCTCGCTGGTCATCCCACAGCTACGTCAAAAGTGCACGCTACTTTGCTAA | [121] |
| *S. aureus* | H1  H2  cApt | GCAATGGTACGGTACCCCTATGCGCATGTACCATTGCAGTTGTCAGAGAGCGA  GGTACA/Dabcyl/TGCGCATAGGGGTACCGTACCATACCCCTATGCGCA/FAM/  GTACCGTACCATTGCTAGCGTCTTCCCGTCCTT | [122] |
| *S. aureus* | Apt1  Apt2 | TCCCTACGGCGCTAACCCCCCCAGTCCGTCCTCCCA GCCTCACACCGCCACCGTGCTACAAC  TCCCTACGGCGCTAACCTCCCAACCGCTCCACCCTGCCTCCGCCTCGCCACCGTGCTACAAC | [123], [124] |
| *S. aureus* | SH-Apt2 | GCAATGGTACGGTACTTCCTCGGCACGTTCTCAGTAGCGCTCGCTGGTCATCCCACAGCTACGTCAAAAGTGCACGCTACTTTGCTAA | [55], [125] |
| *S. aureus* | APTseb1 | GGTATTGAGGGTCGCATCCACTGGTCGTTGTTGTCTGTTGTCTGTTATGTTGTTTCGTGATGGCTCTAACTCTCCTCT | [126] |
| *S. aureus* | G1  #2  #18 | UCCGAACAGCGGAAGGUGGUUCGAAGUUGGGGCUUUGGA  GGGAGUUUUGAUACGGCUUCAUGCAGUAAUGUUUUUAU UCCGAACAGCGGAAGGUGGUUCGAAGUUGGGGCUUUGGA | [47] |
| *S. aureus* | AT-27  AT-33  AT-36  AT-49 | ACCCCTGCAGGATCCTTTGCTGGTACC-(N42)-AGTATCGCTAATCAGTCTAGAGGGCCCCAGAAT | [127] |
| *S. aureus* | H1 | GCAATGGTACGGTACTTCCTCGGCACGTTCTCAGTAGCGCTCGCTGGTCATCCCACAGCTACGTCAAAAGTGCACGCTACTTTGCTAA | [128] |
| *S. aureus* | Antibac1  Antibac2 | GGGACAGGGAGTGCGCTGCTCCCC  GGGGACTAGAGGACTTGTGCGGCC | [48], [129] |
| *E. coli* | SH-Apt1 | GCAATGGTACGGTACTTCCCCATGAGTGTTGTGAAATGTTGGGACACTAGGTGGCATAGAGCCGCAAAAGTGCAGCTACTTTGCTAA | [55], [123] |
| *E. coli* | / | ATCCGTCACACCTGCTCTATCAAATGTGCAGATATCAAGACGATTTGTACAAGATGGTGTTGGCTCCCGTAT | [130] |
| *E. coli* | GN6  GN12 | ATACCAGCTTATTCAATTGGGTGAGGGGGGGTTCACAACGTTAAAGATAGACGGGGGAAGATAGTAAGTGCAATCT | [131] |
| *E. coli* | 6-3  8-1  8-7  8-8  8-12  8-13  8-19  8-35 | UGGUUUCAGCGACAGGAGGGGUGUAGGUGGAUUGCUGUCCUUUGCGUGU  UGCUAGUGUUGUAUGCACGUGGAGGAGGAGGCGUACACUUGCUUUGUGGU  GAUUGACCGUAUGGAGGAUGCAAAGGGAGGGAGGUCACUUGAGUUAGUUA  GCAGGAUGUGGAGGAGGCAUCUGCUGCAAUCGGGACUUGUGUCGAGUAUC  GCAUUGUCUGCGUGUGGAGGCAGGAGGCAAGAUAAGAGGUGAUGCGGUUG  CAUGUUGGCGAUACGUCUAAACGGUGGGUUGUGGAGGAUUGAUUUAUACG  AGUAGUGUCAGCGUGUGGUGGAGGUUGGCGACAUAUGUAGGGUGCGAUUG  UGCGCAAUACACGGUGAGGAGGUGGAGAGAUGUAGGUGCUUAGCAGUUGA | [132] |
| *E. coli* | ECA I  ECA II | GTCTGCGAGCGGGGCGCGGGCCCGGCGGGGGATGCGC  ACGGCGCTCCCAACAGGCCTCTCCTTACGGCATATTA | [133], [134] |
| *E. coli* | / | GCAATGGTACGGTACTTCCCCATGAGTGTTGTGAAATGTTGGGACACTAGGTGGCATAGAGCCGCAAAAGTGCACGCTACTTTGCTAA | [135] |
| *E. coli* | Stx1  stx2 | ATCCAGAGTGACGCAGCAGTAGTTTGTTGGTTATTACGGCGGGTTGCGATGGGTGCGAATCGGTGGACACGGTGGCTTAGT  ATCCAGAGTGACGCAGCAGGAAAGGACGTCAAATTAGGGGCCGGGACAACGAAAGCCCACAACTGGACGGTGGCTTAGT | [136] |
| *P. aeroginosa* | F23 | CCCCCGTTGCTTTCGCTTTTCCTTTCGCTTTTGTTCGTTTCGTCCCTGCTTCCTTTCTTG | [137] |
| *B. cereus* | / | AGCAGCACAGAGGTCAGATGCCCCCCTTTTATCCGTCGGCATGATGTCTCCCGATCCGGTCCTATGCGTGCTA | [138]  [139] |
| *B. cereus* | B15  B16 | AGCAGCACAGAGGTCAGATGGGCGGGTTTGGATCTTTGGTTGGCGCCTGTTTCTTTATGACCTATGCGTGCTACCGTGAA  AGCAGCACAGAGGTCAGATGATATGTTTACGCCAGTGGTATTATTGGGGTTGATATGTCACCTATGCGTGCTACCGTGAA | [89] |
| *B. cereus* | 13-18  13-24 | AGCACAGAGGTCAGATGGGCTACTGGAGCATCTGGTAACGAAGTACCCTCGGGGCGG  AGCACAGAGGTCAGATGATCGAGGGCGCAGACCGAACCCGCGTGCGCAGTACAAGGGC | [140] |
| *Acinetobacter baumannii* | AB | AATCAGGCTCAGCATGGAGTTGCGAGGCCAATATCCGGTTAAGCG | [141]  [142] |
| *Acinetobacterer baumanni* | K2 | ACAGCACCACAGACCACATATCACATGCTGTCGCCTTGCGATATCAATTCCAGTGATGTTTGTCTTCCTGCC | [141] |
| *Leptospira interrogans* | LAP3 | TGGCGTTAGAGATACCGGAACCGGTGTCGGGCGTCTGAAGAATCC | [143] |
| *Bacillus cytotoxicus* | BAS6R | ATCCGTCACACCTGCTCTGCACGGGCTCAGTTTGGCTTTGTATCCTAAGAGGATGGTGTTGGCTCCCGTAT | [29] |
| *Vibrio cholerae* | CT916 | GGCAAAAAGGATTGCCCAGGTCTGCTGTCTAGCCGGATTC | [43] |
| *Clostridium difficile* | / | TAGTGATGCCTTTGTTGAGA-[N40]-TCTTCATCGTCCACTAAATT | [146] |
| *S. typhimurium* | H2 | TATGGCGGCGTCACCCGACGGGGACTTGACATTATGACAG | [128] |
| *S. Typhimurium* | Apt S.T | TGGCTAGCTCAGTCATATGGCGGCGTCACCCGACGGGGACTTGACATTATGACAGCCGCG | [147] |
| *Vibrio parahaemolyticus* | Apt VP | TGGCTAGCTCAGTCATCTAAAAATGGGCAAAGAAACAGTGACTCGTTGAGATACTCCGCG | [147] |
